# Supplementary material
Source: PubMed Central journal article supplement (PMC4936106)
Supplement: JB.01004-15_zjb999094097so1.pdf [file JB.01004-15_zjb999094097so1.pdf]

Supplemental Fig. 1. Alignment of recombinases:

|               |       |                             |
|---------------|-------|-----------------------------|
| E. coli       | XerD  | AAC75932; 1A0P              |
| B. anthracis  | IntXO | GBAA_RS29165; GBAA_pXO1_182 |
| B. anthracis  | XerD  | GBAA_RS20945; GBAA_4311     |
| B. anthracis  | XerC  | GBAA_RS19275; GBAA_3969     |
| B. anthracis  | XerS  | GBAA_RS29235; GBAA_pXO1_200 |
| P1 phage      | Cre   | YP_006472.1                 |
| S. cerevisiae | Flp   | AKA10108.1                  |

The sequences of the proteins listed above are aligned below in the same order as listed. The active site residues identified for IntXO recombinase (second line below) in Fig.3D are highlighted below in red, where the stars (\*) mark these as 4 of the 6 fully conserved residues: IntXO R-186, H-292, R-295 and Y-327

|       |                                                                |     |
|-------|----------------------------------------------------------------|-----|
| XerD  | -----QD-----LARIEQFL-DALWLEK                                   | 17  |
| IntXO | -MNIINYEHNNQLVKSKSDFDSSHFEEKIMGMGIRNIDYSQLSEGLVYLFLHDEPSLTK    | 59  |
| XerD  | -----M-----EDQLKDFI-HYMVVEK                                    | 16  |
| XerC  | -----MNV-----KKLLQLFV-GYLQIER                                  | 18  |
| XerS  | -----MSN-----QEKEFKILIDKHK-----SKMPWYII-EYAEMKT                | 32  |
| Cre   | MSNLLTVHQNL--PALPVDATSDEVRKNLMDMF-----RDRQ                     | 35  |
| Flp   | -----MPQ-----FDILCKTP-----PKVLVRQFVERF----E                    | 24  |
|       |                                                                |     |
| XerD  | NLAENTLNAYRRDLSMMVEWLHHRGLTLATA-Q-----SDDLQA--LL               | 57  |
| IntXO | KRSERTKKLYLHDLSHFLRYIKETIGI-----IKELSHNEMEI--YF                | 99  |
| XerD  | GLAKNTVVSYERDLKSYVKYLQKVEQAKSFH-E-----VTRLHIVN--FL             | 58  |
| XerC  | NYSKYTIASYQNDLEHFVQFMEREGIS-SFL-D-----ITYADVRL--YL             | 59  |
| XerS  | ALSPATLYAYITEFEKFLKWLISNRLAVENG-KVVTNICDVP ISTLENLPLNEART--FQ  | 89  |
| Cre   | AFSEHTWKMLLSVCRSAAWC-----KLNRRKWFPAEPEDVRD--YL                 | 75  |
| Flp   | RPSGE-KIALCAAELTYLCWMITHNGTAIKRATFMSYNTIISN---SLSLDIVNKSQF     | 79  |
|       | : :                                                            |     |
| XerD  | AERLEGG-YKATSSAR-----LLSAVRRLFQYLYREKFREDDPSAH                 | 97  |
| IntXO | -YQLSKK-YAATTLRR-----KKTVVQQFLKYVYDNNGLSDNFSSR                 | 138 |
| XerD  | QHLKENG-KSSKTLAR-----HIASIRSFHQFLLRERAVEHDPSVH                 | 98  |
| XerC  | TTLHDEK-LARKSVAR-----KVSSLSRSLYRFLMREGYRKDNPFAL                | 99  |
| XerS  | RYLQEGE-IETRAINR-----TFSALKSLFKYLAQNTENEQGENYI                 | 129 |
| Cre   | LYLQARG-LAVKTIQQ-----HLGQLNMLHRRSGLRPSDSNAVSL                  | 115 |
| Flp   | KYKTQKATILEASLKLIPAWEFTIIPYYGQKHQSDITDIVSSLQLQFESSEADKGNSH     | 139 |
|       | : : : :                                                        |     |
| XerD  | -----L-----ASPKLPQRLPKDLSEAQVERLLQAPLID----                    | 126 |
| IntXO | LKK---V-----SVKKEELVNRDLFPVEEVEIIDLTKKTNF--                    | 171 |
| XerD  | -----I-----ETPQGERKLPKVLVSVDEVEALLQTPKMT----                   | 127 |
| XerC  | -----A-----SLPKKELSLPKFLYAEELFEVSDTE----                       | 128 |
| XerS  | SRNVMDKIELHKEKVDAAARADDVANMIFNEKDDVAFQFLANDYGEMLKDISPKKYS--    | 187 |
| Cre   | ---VMRRI--RKENVDAGERAK-----QALAFERT-DFDQVRSMLMENS-----         | 153 |
| Flp   | SKKMLKAL-----LSEGESIWEITEKILNSF                                | 165 |
|       | . : :                                                          |     |
| XerD  | ---QPLELRDKAMLEVLYATG---LRVSELVGLTMSDISLR---QGVVR-----         | 166 |
| IntXO | ---FMYSLFFLLTTTG--- <b>LR</b> IEEVANAKWADLVFHPSLNVYLLR-----    | 210 |
| XerD  | ---SAFGVRDKAMLELLYATG---LRVSELIALNLEDVHLT---MGFVR-----         | 167 |
| XerC  | ---TPLQRNQALLELMYATG---IRVSECVNLQLTDIDFA---VGTIL-----          | 168 |
| XerS  | ---FFQRDKERDIAIISLILGTG---LRVSEVASLTISSINFR---QGKVK-----       | 229 |
| Cre   | ---RCQDIRNLAFGLGIAYNTL---LRIAEIARIRVKDISRT---DGGRM-----        | 193 |
| Flp   | EYTSRFTKTKTLYQFLFLATF INCGRFSDIKNVDPKSFKLVQNKYLGVI IQCLVTETKTS | 225 |
|       | : * * . : ..                                                   |     |
| XerD  | -----VIGKGNKERLVLGEEAVYWLETYLEHGR-----PWLLNGV--S--IDVLFPS      | 210 |
| IntXO | -----VVGKGNKTREVRIFEDVLNLDLCHLRQLRK-----QKSELDA--S-SSSAFLPK    | 255 |
| XerD  | -----CVGKGNKERIIPGLSLATEAIQYIEKGR-----RELMGKK--V--VDALFLN      | 211 |
| XerC  | -----VMGKGGKQRYIPFGSYAQDALITYIENGR-----KQLAEKT--EEQSHMVFLN     | 214 |
| XerS  | -----VTRKGNKRSSVLATRSCLDDVQYIYKVRP-----SKYNCQPQ---DEDLLFVT     | 273 |
| Cre   | -----LIHIGRTKTLVSTAG---VEKALSGLVTKLVERWISVSGVADDPNNYLFCSR      | 241 |
| Flp   | VSRHIYFFSARGRIDPLVYLDE-----FLRNSE-----PVLKR                    | 258 |
|       | * . : :                                                        |     |
| XerD  | QRAQ-----QMRQTF-----WHRIKHY-----AVLAGID-SEKLSPHVLRHA           | 247 |
| IntXO | ADGS-----HYRADYLSKYVAEKIEETN-----LPFLRYR-KHRITP <b>HTCR</b> HF | 297 |
| XerD  | HHGN-----RLSRQGF-----WKILKRL-----AKEANIE--KELTPHTLRHS          | 247 |
| XerC  | AKGT-----PLTSRGV-----RYVLNEL-----IKKASLT--MRISPHILRHT          | 250 |
| XerS  | NYKG-----KYTQLTV-----RAIQKLC-----DKYSSAF-DEKRSPhKLRHT          | 310 |
| Cre   | VRKNGVA-APSATSQLSTRAL-----EGIFEATHRLIYGAKDDSGQR-YLAWSGHSARVG   | 294 |
| Flp   | VNRTGNSSSNKQEQYQLLKDNLV---RSYNKAL---KKNAPYSIFAIKNGPKSHIGRHL    | 310 |
|       | . : * *                                                        |     |

|       |                                                                                   |     |
|-------|-----------------------------------------------------------------------------------|-----|
| XerD  | FATHLLNHGADLRVVQMLL-GHSDLST----TQIYTHVATERLRQLHQ-----                             | 290 |
| IntXO | FANHLMGKGVELKKIRDYL-GHESIMT----TER <sup>Y</sup> LRERTRRQNLATIDIGNSLF-----         | 347 |
| XerD  | FATHLLENGADLRAVQEML-GHADIST----TQIYTHVSKTRLKDVYKQFHPRA-----                       | 296 |
| XerC  | FATHMLDEGADLRTVQELL-GHENLST----TQIYTHVSKERLRSVYMKHHPRA-----                       | 299 |
| XerS  | YATNHYKENKDLVLLRDQL-GHTSVEV----TSIYTNINNEKKREAVDRLERRQFE----                      | 361 |
| Cre   | AARDMARAGVSIPEIMQAG-GWTNVNI----VMNYIRNLDSETGAMVRLLEDGD-----                       | 343 |
| Flp   | MTSFLSMKGL--TELTNVVGNWSDKRASAVARTTYTHQITAIPDH-YFALVSRYYAYDPI                      | 367 |
|       | :                   :                   .                   *                   . |     |

|       |                                                          |     |
|-------|----------------------------------------------------------|-----|
| XerD  | -----                                                    | 290 |
| IntXO | -----                                                    | 347 |
| XerD  | -----                                                    | 296 |
| XerC  | -----                                                    | 299 |
| XerS  | -----                                                    | 361 |
| Cre   | -----                                                    | 343 |
| Flp   | SKEMIALKDETNPIEEWQHIEQLKGSAEGSIRYPANNGIISQEVLDYLSSYINRRI | 423 |

Supplementary Table 1. List of genes discussed in this work

| Gene                                     |                         |              |                              |                      | Protein           |                                                            |
|------------------------------------------|-------------------------|--------------|------------------------------|----------------------|-------------------|------------------------------------------------------------|
| Gene name                                | Description or function | Locus tag    | Old or alternative locus tag | Source               | Protein size (aa) | Protein sequence, N- and C-termini; protein accession code |
| <b>Partition system components, etc.</b> |                         |              |                              |                      |                   |                                                            |
| <i>orf20</i>                             | minireplicon            | GBAA_RS28535 | GBAA_pXO1_0020               | <i>B. anthracis</i>  | 564               | MEKL...VNLL<br>WP_000413217                                |
| <i>orf23</i>                             | minireplicon            | GBAA_RS28545 | GBAA_pXO1_0023               | <i>B. anthracis</i>  | 569               | MGKS...MEIK<br>WP_000520265                                |
| <i>amsP</i>                              | MSI                     | GBAA_RS28725 | GBAA_pXO1_0069               | <i>B. anthracis</i>  | 201               | MIDE...FGKK<br>WP_000564672                                |
| <i>minP</i>                              | MSI                     | GBAA_RS28775 | GBAA_pXO1_0082               | <i>B. anthracis</i>  | 61                | MDIL...SKKK<br>WP_000353184                                |
| <i>sojP</i>                              | MSI (ParA)              | GBAA_RS28785 | GBAA_pXO1_0084               | <i>B. anthracis</i>  | 272               | MDRP...GLRN<br>WP_000375827                                |
| <i>tubZ</i>                              | MSII (TubZ/RepX)        | GBAA_RS28715 | GBAA_pXO1_0067               | <i>B. anthracis</i>  | 435               | MAGN...KLSF<br>WP_000918302                                |
| <i>tubR</i>                              | MSII (TubR)             | GBAA_RS28720 | GBAA_pXO1_0068               | <i>B. anthracis</i>  | 91                | MSNN...EKNN<br>WP_002194758                                |
| <i>esat6</i> -like                       | Unknown                 | GBAA_RS29195 | GBAA_pXO1_0190               | <i>B. anthracis</i>  | 410               | MSTQ...DSDK<br>WP_000107153                                |
| <b>Tyrosine recombinases</b>             |                         |              |                              |                      |                   |                                                            |
| <i>intXO</i>                             | MSII                    | GBAA_RS29165 | GBAA_pXO1_0182               | <i>B. anthracis</i>  | 317               | MGIR...NSLF<br>WP_010890022                                |
| <i>intXO</i>                             | MSII                    | GBAA_RS29165 | GBAA_pXO1_0182               | <i>B. anthracis</i>  | 347               | MNII...NSLF<br>WP_001021546                                |
| <i>xerS</i>                              | Unknown                 | GBAA_RS29235 | GBAA_pXO1_0200               | <i>B. anthracis</i>  | 361               | MSNQ...RQFE<br>WP_000070475                                |
| <i>xerC</i>                              | Chromosome partition    | GBAA_RS19275 | GBAA3969                     | <i>B. anthracis</i>  | 299               | MNVK...HPRA<br>WP_001101226                                |
| <i>xerD</i>                              | Chromosome partition    | GBAA_RS20945 | GBAA4311                     | <i>B. anthracis</i>  | 296               | MEDQ...HPRA<br>WP_000390080                                |
| <i>xerD</i>                              | Chromosome partition    | AAC75932     | PDB: 1A0P                    | <i>E. coli</i>       | 298               | MKQD...HPRA<br>WP_000806638                                |
| <i>cre</i>                               | Phage replication       | P1_gp003     |                              | P1 phage             | 343               | MNSL...EDGD<br>YP_006472.1                                 |
| <i>flp</i>                               | Plasmid replication     | R0010W       |                              | <i>S. cerevisiae</i> | 423               | MPQF...NRRI<br>AKA10108.1                                  |
